# Supplementary material for: Artificial MicroRNAs Targeting C9orf72 Can Reduce Accumulation of Intra-nuclear Transcripts in ALS and FTD Patients
Source: PubMed Central journal article supplement — Mol Ther Nucleic Acids. 2019 Jan 30;14:593–608. doi: 10.1016/j.omtn.2019.01.010 (PMC6378669; doi:10.1016/j.omtn.2019.01.010), 2019-01-30
Supplement: mmc1.pdf [file mmc1.pdf]

OMTN, Volume 14

## Supplemental Information

### **Artificial MicroRNAs Targeting *C9orf72* Can Reduce Accumulation of Intra-nuclear Transcripts in ALS and FTD Patients**

**Raygene Martier, Jolanda M. Liefhebber, Jana Miniarikova, Tom van der Zon, Jolanda Snapper, Iris Kolder, Harald Petry, Sander J. van Deventer, Melvin M. Evers, and Pavlina Konstantinova**

Supplementary material

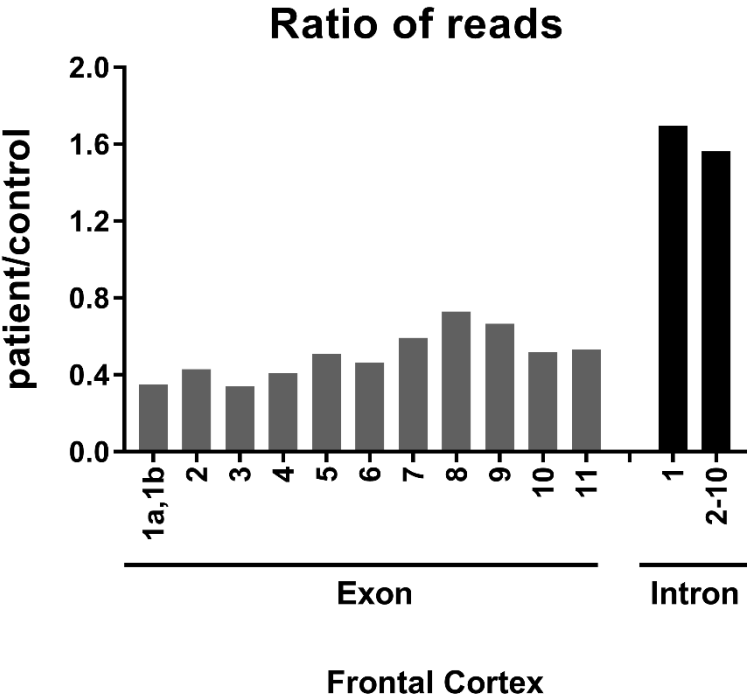

Figure S1. Ratio of reads between C9-ALS patients and controls in cortex. The total amount of reads counted in different intronic and exonic regions from C9-ALS patients were divided by the total amount of reads from the same region of control donors.

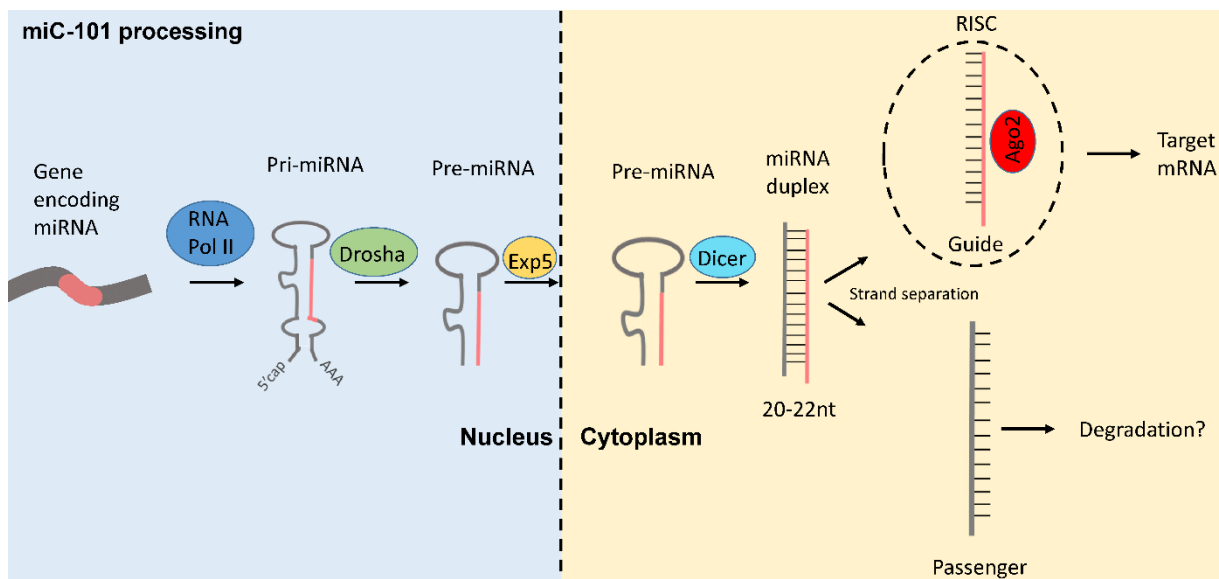

**Figure S2. Processing of miC-101 in the cell.** In the canonical pathway, miC-101 is transcribed by RNA pol II and produces a primary miRNA (pri-miC) hairpin, which is processed by Drosha to generate a precursor miRNA (pre-miC). The pre-miC is transported by exportin 5 (exp 5) into the cytoplasm for further processing by Dicer to produce a miC duplex of ~20-22 basepairs. An Argonaute (Ago2) protein binds the duplex and incorporates the mature miC-101 guide strand in the RNA-induced silencing complex (RISC) to suppress downstream target gene expression. The passenger strand of the miC-101 duplex is usually discarded but can also be functional.<sup>1</sup>

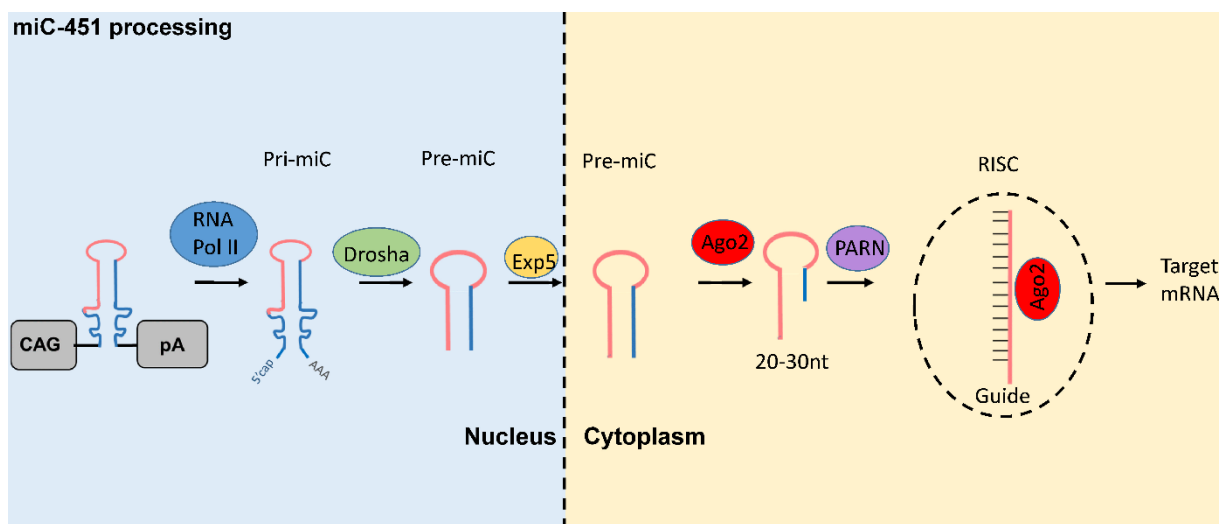

**Figure S3. Processing of miC-451 in the cell.** In the non-canonical pathway, miC-451 follows the same Drosha dependent processing in the nucleus into a pre-miC. The pre-miC-451 is too short to be cleaved by dicer and is directly loaded into Ago proteins. Ago2 cleaves the 3' arm of pre-miR-451 by its slicer activity and yields a ~30-nt intermediate that is further trimmed by PARN to generate a mature miC of ~23nt. The trimming of the miC-451 is not essential for efficiency and miC-451 can be functional with mature guide strands longer than the mature length.<sup>2</sup>



miRNA scaffolds are indicated in red and blue, respectively. The 5' and 3' flanking nucleotides are indicated in black.

| miC                               | mature miRNA (5' to 3' Guide strand) | length | reads | % reads |
|-----------------------------------|--------------------------------------|--------|-------|---------|
| <b>miC38_451</b>                  |                                      |        |       |         |
| Total expression values: 6,21E+04 |                                      |        |       |         |
| 5'                                | guide                                |        |       |         |
| c                                 | a g a                                |        |       |         |
| u u g g g a u g g c a a g         | g c a a u c u c u g u c u u g g c    |        |       |         |
| g a c c c u a u c g u u c         | c g u u a g a g a c a g a a c c g    |        |       |         |
| a                                 | a u c                                |        |       |         |
| 3'                                |                                      |        |       |         |
| 1                                 | AGCAATCTCTGTCTTGGCAACAGCC            | 25     | 12263 | 22,2%   |
| 2                                 | AGCAATCTCTGTCTTGGCAACGCCAT           | 27     | 11500 | 20,8%   |
| 3                                 | AGCAATCTCTGTCTTGGCAACGCCAAT          | 28     | 7931  | 14,3%   |
| 4                                 | AGCAATCTCTGTCTTGGCAACGCCAAGA         | 29     | 4655  | 8,4%    |
| 5                                 | AGCAATCTCTGTCTTGGCAACGCCAAG          | 28     | 3896  | 7,0%    |
| 6                                 | AGCAATCTCTGTCTTGGCAACGCCAA           | 27     | 2978  | 5,4%    |
| 7                                 | AGCAATCTCTGTCTTGGCAACGCCCT           | 26     | 2973  | 5,4%    |
| 8                                 | AGCAATCTCTGTCTTGGCAACAGC             | 23     | 2773  | 5,0%    |
| 9                                 | AGCAATCTCTGTCTTGGCAACGCCATT          | 28     | 2732  | 4,9%    |
| 10                                | AGCAATCTCTGTCTTGGCAACGCCAAGT         | 29     | 1779  | 3,2%    |
| 11                                | AGCAATCTCTGTCTTGGCAACGCCAAA          | 28     | 1048  | 1,9%    |
| 12                                | AGCAATCTCTGTCTTGGCAACA               | 22     | 805   | 1,5%    |
|                                   | total                                |        |       | 100,0%  |
| <b>miC39_451</b>                  |                                      |        |       |         |
| Total expression values: 2,05E+05 |                                      |        |       |         |
| 5'                                | guide                                |        |       |         |
| c                                 | a g u                                |        |       |         |
| u u g g g a u g g c a a g         | a a a g c a a u c u c u g u c u u    |        |       |         |
| g a c c c u a u c g u u c         | u u u c g u u a g a g a c a g a a    |        |       |         |
| a                                 | a u c                                |        |       |         |
| 3'                                |                                      |        |       |         |
| 1                                 | TAAAGCAATCTCTGTCTTGGCA               | 22     | 76916 | 39,1%   |
| 2                                 | TAAAGCAATCTCTGTCTTGGCAA              | 23     | 75442 | 38,4%   |
| 3                                 | TAAAGCAATCTCTGTCTTGGCAA              | 24     | 13838 | 7,0%    |
| 4                                 | TAAAGCAATCTCTGTCTTGGCAAAG            | 25     | 11180 | 5,7%    |
| 5                                 | TAAAGCAATCTCTGTCTTGGC                | 21     | 6379  | 3,2%    |
| 6                                 | TAAAGCAATCTCTGTCTTGGCAAT             | 24     | 2638  | 1,3%    |
| 7                                 | AAAGCAATCTCTGTCTTGGCAA               | 22     | 2314  | 1,2%    |
| 8                                 | TAAAGCAATCTCTGTCTTGGCAAAGA           | 26     | 2238  | 1,1%    |
| 9                                 | TAAAGCAATCTCTGTCTTGGCAT              | 23     | 1613  | 0,8%    |
| 10                                | AAAGCAATCTCTGTCTTGGCAA               | 21     | 1502  | 0,8%    |
| 11                                | AAAGCAATCTCTGTCTTGGCAAAG             | 24     | 1248  | 0,6%    |
| 12                                | TAAAGCAATCTCTGTCTTGGCAAAGT           | 26     | 1243  | 0,6%    |
|                                   | total                                |        |       | 99,9%   |
| <b>miC43_451</b>                  |                                      |        |       |         |
| Total expression values: 1,36E+04 |                                      |        |       |         |
| 5'                                | guide                                |        |       |         |
| c                                 | a g u                                |        |       |         |
| u u g g g a u g g c a a g         | u g g c a a g a a a a g u u a u u    |        |       |         |
| g a c c c u a u c g u u c         | a c c g u u c u u u u c a a a u a    |        |       |         |
| a                                 | a u c                                |        |       |         |
| 3'                                |                                      |        |       |         |
| 1                                 | TTGGCAAGAAAAGTTATTTCTCAAT            | 25     | 5312  | 42,7%   |
| 2                                 | TTGGCAAGAAAAGTTATTTCTCAATAACT        | 29     | 1853  | 14,9%   |
| 3                                 | TTGGCAAGAAAAGTTATTTCTCA              | 23     | 1387  | 11,1%   |
| 4                                 | TTGGCAAGAAAAGTTATTTCTCAATAAC         | 28     | 1253  | 10,1%   |
| 5                                 | TTGGCAAGAAAAGTTATTTCTCAATA           | 26     | 1015  | 8,2%    |
| 6                                 | TTGGCAAGAAAAGTTATTTCTCAATAACTT       | 30     | 556   | 4,5%    |
| 7                                 | TTGGCAAGAAAAGTTATTTCTCAA             | 24     | 525   | 4,2%    |
| 8                                 | TTGGCAAGAAAAGTTATTTCTCAATAA          | 27     | 272   | 2,2%    |
| 9                                 | TTGGCAAGAAAAGTTATTTCTC               | 22     | 228   | 1,8%    |
| 10                                | TTGGCAAGAAAAGTTATTTCT                | 23     | 54    | 0,4%    |
| 11                                |                                      |        |       | 0,0%    |
| 12                                |                                      |        |       | 0,0%    |
|                                   | total                                |        |       | 100,0%  |
| <b>miC49_451</b>                  |                                      |        |       |         |
| Total expression values: 1,37E+05 |                                      |        |       |         |
| 5'                                | guide                                |        |       |         |
| c                                 | a g a                                |        |       |         |
| u u g g g a u g g c a a g         | g c u c a u c c u a u g u u c a a    |        |       |         |
| g a c c c u a u c g u u c         | c g a g u a g g a u c a a g u u      |        |       |         |
| a                                 | a u c                                |        |       |         |
| 3'                                |                                      |        |       |         |
| 1                                 | AGCTCATCCTATGTTCAAGCTCTT             | 24     | 76725 | 58,6%   |
| 2                                 | AGCTCATCCTATGTTCAAGCTCTTG            | 25     | 14652 | 11,2%   |
| 3                                 | AGCTCATCCTATGTTCAAGCTCTTGA           | 26     | 13511 | 10,3%   |
| 4                                 | AGCTCATCCTATGTTCAAGCTCT              | 23     | 11970 | 9,1%    |
| 5                                 | AGCTCATCCTATGTTCAAGCTCTTGAAC         | 28     | 6402  | 4,9%    |
| 6                                 | AGCTCATCCTATGTTCAAGCTCTTGT           | 26     | 2060  | 1,6%    |
| 7                                 | AGCTCATCCTATGTTCAAGCTCTTGAA          | 27     | 1982  | 1,5%    |
| 8                                 | AGCTCATCCTATGTTCAAGCTCTTT            | 25     | 1321  | 1,0%    |
| 9                                 | AGCTCATCCTATGTTCAAGCTCTTGAACA        | 29     | 693   | 0,5%    |
| 10                                | GCTCATCCTATGTTCAAGCTCTT              | 23     | 634   | 0,5%    |
| 11                                | AGCTCATCCTATGTTCAAGCTCTTA            | 25     | 534   | 0,4%    |
| 12                                | AGCTCATCCTATGTTCAAGCTCTTGAT          | 27     | 406   | 0,3%    |
|                                   | total                                |        |       | 100,0%  |
| <b>miC50_451</b>                  |                                      |        |       |         |
| Total expression values: 1,06E+04 |                                      |        |       |         |
| 5'                                | guide                                |        |       |         |
| c                                 | a g u                                |        |       |         |
| u u g g g a u g g c a a g         | g g g a c a c u a c a a g g u a g    |        |       |         |
| g a c c c u a u c g u u c         | c c c u g u g a u g u u c c a u c    |        |       |         |
| a                                 | a a u                                |        |       |         |
| 3'                                |                                      |        |       |         |
| 1                                 | TGGGACACTACAAGGTAGTATTCTACCTT        | 29     | 5354  | 55,9%   |
| 2                                 | TGGGACACTACAAGGTAGTATTCTACCT         | 28     | 961   | 10,0%   |
| 3                                 | TGGGACACTACAAGGTAGTATT               | 22     | 611   | 6,4%    |
| 4                                 | TGGGACACTACAAGGTAGTATTC              | 23     | 560   | 5,8%    |
| 5                                 | TGGGACACTACAAGGTAGTATTCTACCTTT       | 30     | 485   | 5,1%    |
| 6                                 | TGGGACACTACAAGGTAGTATTCTACCTTG       | 30     | 461   | 4,8%    |
| 7                                 | TGGGACACTACAAGGTAGTATTCT             | 24     | 284   | 3,0%    |
| 8                                 | TGGGACACTACAAGGTAGTATTCTACC          | 27     | 274   | 2,9%    |
| 9                                 | TGGGACACTACAAGGTAGTATTCTACCTTGT      | 31     | 252   | 2,6%    |
| 10                                | TGGGACACTACAAGGTAGTATTCTACCTTA       | 30     | 149   | 1,6%    |
| 11                                | TGGGACACTACAAGGTAGTATTCTACCTA        | 29     | 126   | 1,3%    |
| 12                                | GGGACACTACAAGGTAGTATTCTACCTT         | 28     | 73    | 0,8%    |
|                                   | total                                |        |       | 100,0%  |

**Table S2. miC-451 processing by NGS.** Sequence distribution (%) of guide strands of reads mapping to miC38\_451, miC39\_451, miC43\_451, miC49\_451 and miC 50\_451.

Performed as described in table S1.

## References

1. Miniarikova, J, Zanella, I, Huseinovic, A, van der Zon, T, Hanemaaijer, E, Martier, R, *et al.* (2016). Design, Characterization, and Lead Selection of Therapeutic miRNAs Targeting Huntingtin for Development of Gene Therapy for Huntington's Disease. *Mol. Ther. Nucleic Acids* **5**: e297.
2. Mayuko Yoda, Daniel Cifuentes, Natsuko Izumi, Yuriko Sakaguchi, Tsutomu Suzuki, AJG and YT (2013). PARN mediates 3'-end trimming of Argonaute2-cleaved precursor microRNAs **5**.
